# Supplementary material for: Investigating the SO 2 absorption behavior of pyrimidine-based deep eutectic solvents via a dual-site thermodynamic model
Source: Royal Society of Chemistry journal article supplement (doi:10.1039/d5im00317b), 2026-01-01
Supplement: d5im00317b1.pdf [file d5im00317b1.pdf]

## Investigating the SO<sub>2</sub> absorption behavior of pyrimidine-based deep eutectic solvents *via* dual-site thermodynamic model

Yiru Zou,<sup>ac</sup> Xiaoxiao Xing,<sup>a</sup> Chao Wang,<sup>c</sup> Duanjian Tao,<sup>\*d</sup> Haiyan Ji,<sup>c</sup> Peiwen Wu,<sup>\*c</sup> Yanhong Chao,<sup>a</sup> and Wenshuai Zhu<sup>\*abc</sup>

<sup>a</sup> College of Chemical Engineering and Environment, State Key Laboratory of Heavy Oil Processing, College of Science, China University of Petroleum-Beijing, Beijing 102249, PR China, E-mail address: zhuws@cup.edu.cn

<sup>b</sup> Shandong Key Laboratory of Green Electricity & Hydrogen Science and Technology, Shandong Institute of Petroleum and Chemical Technology, Dongying 257061, PR China

<sup>c</sup> School of Chemistry and Chemical Engineering, School of the Environment and Safety Engineering, School of Materials Science and Engineering, Jiangsu University, Zhenjiang 212013, PR China

<sup>d</sup> College of Chemistry and Chemical Engineering, Jiangxi Normal University, Nanchang 330022, PR China

### 1. Gas Absorption:

Using a "double-tank" gas absorption device, the absorption experiment of SO<sub>2</sub> or CO<sub>2</sub> was carried out. As shown in **Scheme S1**, the volume of the gas storage tank (GT) is 122.300 cm<sup>3</sup>, denoted as  $V_{GT}$ ; The volume of the absorption tank (AT) is 46.187 cm<sup>3</sup>, and it is equipped with a magnetic stirrer with a certain volume, denoted as  $V_{AT}$ . A magnetic stirrer (MS) is equipped directly below the absorption tank, and its rotation speed is kept at 350 rpm. The pressure sensors PV and SV are used to measure the pressure of the gas storage tank and absorption tank and transmit it to the computer (CP), denoted as  $P1i\ GT$  and  $P2i\ AT$  ( $i = 0, 1, 2, 3, \dots, n$ ). The measurement accuracy of the temperature control device in the constant temperature water bath (CT) is  $\pm 0.1$  K, which is used to adjust the temperature of the absorption tank and the gas storage tank, so as to explore the gas absorption performance at different temperatures. The vacuum pump (VP) is used to evacuate the air or N<sub>2</sub> in the tank before gas absorption,

and to remove the remaining acid gas in the tank after absorption. To protect personnel safety and prevent harmful gases from being directly discharged into the atmosphere, the remaining acid gases should be slowly introduced into high-concentration sodium hydroxide (NaOH) solution for tail gas treatment.

In a typical absorption experiment, a certain mass of sample ( $w$ ) was weight with an analytical balance (with an accuracy of  $\pm 0.0001$  g) and put it into an absorption tank. After sealing the device, put it in a constant temperature water bath, and set the required temperature (298.15 K, 313.15 K, 333.15 K and 353.15 K). After the temperature of each part stabilizes, turn off F1 and F2, then turn on F3, F4, and VP to empty the gas storage tank and absorption tank. After the pressure stabilizes, turn off F3, F4, and VP. At this time, the indication of PV is  $P10\text{ GT}$ , and the indication of SV is  $P20\text{ AT}$ . Pour a certain amount of  $\text{SO}_2$  or  $\text{CO}_2$  into the gas storage tank and close  $F_1$ . After the PV display is stable, it is recorded as  $P11\text{ GT}$ , and the SV display is recorded as  $P21\text{ AT}$ . At this time, the pressure of  $\text{SO}_2$  or  $\text{CO}_2$  in the gas storage tank is  $P_{GT1} = P11\text{ GT} - P10\text{ GT}$ . Turn on the magnetic stirrer, slowly introduce a certain amount of  $\text{SO}_2$  or  $\text{CO}_2$  into the suction tank, and then close  $F_3$ . After the number of SV is stable, it is recorded as  $P2i\text{ AT}$  ( $i = 2, 3, 4, \dots, N$ ), The pressure of  $\text{SO}_2$  or  $\text{CO}_2$  in the absorption tank is recorded as  $P_{ATi} = P2i\text{ AT} - P21\text{ AT}$ . At this time, the indication of PV is recorded as  $P1i\text{ GT}$  ( $i = 2, 3, 4, \dots, N$ ), and the pressure of  $\text{SO}_2$  or  $\text{CO}_2$  in the gas tank is recorded as  $P_{GTi} = P2i\text{ GT} - P20\text{ GT}$ . Then, the absorption capacity ( $m_{\text{gas}}$ ) of  $\text{SO}_2$  or  $\text{CO}_2$  gas is calculated by eq (S1):

$$m_{\text{gas}} (\text{g/g}) = [\rho P_{GT1} \text{ gas} \cdot V_{GT} - \rho P_{GTi} \text{ gas} \cdot V_{GT} - \rho P_{ATi} \text{ gas} (V_{AT} - w/\rho)]/w \quad (\text{S1})$$

Where  $\rho P_{GT1} \text{ gas}$ ,  $\rho P_{GTi} \text{ gas}$ , and  $\rho P_{ATi} \text{ gas}$  represent the gas density ( $\text{g cm}^{-3}$ ) of  $P_{GT1}$ ,  $P_{GTi}$  and  $P_{ATi}$ , respectively, and the values are obtained from the NIST Chemistry WebBook database;  $V_{GT}$  and  $V_{AT}$  represent the volume ( $\text{cm}^3$ ) of the gas storage tank and the absorption tank, respectively;  $w$  and  $\rho$  represent the mass (g) and density ( $\text{g cm}^{-3}$ ) of the DESs, respectively.

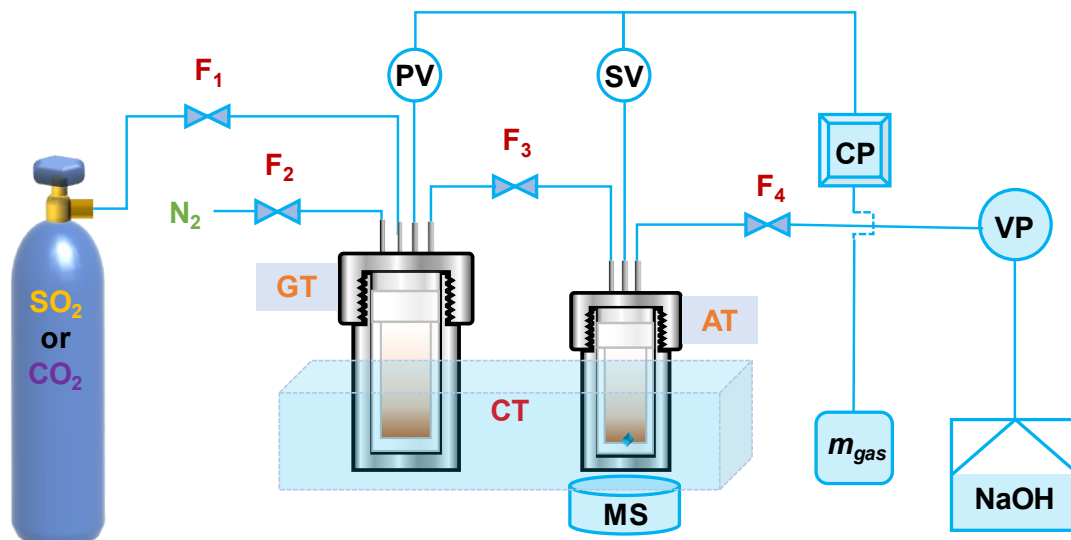

**Scheme S1.** Schematic diagram of gas absorption device (GT: gas storage tank; AT: absorption tank; CT: constant temperature water bath; MS: magnetic stirrer;  $F_1 \sim F_4$ : gas valves; PV, SV: pressure sensors; CP: computer; VP: vacuum pump)

**Absorption-desorption Experiment:** The regeneration performance of DESs was investigated, and the specific operations were as follows: First, under the conditions of 298.15 K and 1.0 bar, the  $\text{SO}_2$  absorption experiment was carried out. Then, the vacuum pump and  $F_3$ ,  $F_4$  were turn on to remove the residual gas, and raise the temperature to 353.15 K. Continue to evacuate for 60 min, open  $F_2$  and introduce  $\text{N}_2$  to exhaust  $\text{SO}_2$ ; Turn off  $F_2$  and reduce the temperature to 298.15K. After the temperature is stable, close  $F_3$ ,  $F_4$  and vacuum pump, and carry out the absorption experiment.

## 2. Materials and Characterizations:

**Materials:** Sulfur dioxide ( $\text{SO}_2$ , 99.99%) was obtained from Nanjing Hongye Special Gas Supply Co., Ltd. Carbon dioxide ( $\text{CO}_2$ , 99.99%) was obtained from Zhenjiang Zhongpu Gas Company. 2-Aminopyrimidine (AmPyr, 98%), 2-Chloropyrimidine (ChPyr, 99%), 2-Bromopyrimidine (BrPyr, 98%), 4-Amino-2-hydroxypyrimidine (Cyt, 98%), 2,4-Dihydroxypyrimidine (Ura, 99%), 3-Aminopyridazine (AmPd, 98%), 2-Aminopyrazine (AmPz, 99%) and 2,4,6-Triaminopyrimidine (TAmPyr, 98%) were purchased from Aladdin Reagent (Shanghai) Co., Ltd. 4,6-Diaminopyrimidine (DAmPyr, 98%) was purchased from

Shanghai Macklin Biochemical Co., Ltd. Dimethylsulfoxide- $d_6$  (DMSO- $d_6$ , 99.9%) was purchased from Shanghai Macklin Biochemical Co., Ltd. 1-ethyl-3-methylimidazolium Chloride ( $C_2mimCl$ , 99%) and 1-ethyl-3-methylimidazolium Bromide ( $C_2mimBr$ , 99%) were purchased from Shanghai Chengjie Chemical.

**Characterizations:** The density of as-prepared DESs were measured from 293.15 - 353.15 K *via* Anton Paar densimeter (DMA 4500m) with an uncertainty of 0.00001 g cm<sup>-3</sup>. The viscosity was measured by HR-103060000 with 5% uncertainty over a measurement range of 273.15 - 353.15 K. Under N<sub>2</sub> atmosphere, thermogravimetric analysis (TGA) was performed using a STA449C Jupiter Simultaneous Thermal Analyzer and heated from room temperature to 800 K at a heating rate of 10 K min<sup>-1</sup>. The mechanism of SO<sub>2</sub> absorption was investigated *via* FT-IR and <sup>1</sup>H-NMR. The FT-IR measurement of the sample used an Attenuated Total Reflection (ATR) detector, which does not require the addition of KBr for tablet pressing and can directly analyze solids, liquids, films, *etc.* After ensuring the ATR crystal surface was clean and uncontaminated, a background signal was scanned with an empty light path without placing any sample. For liquid samples, 1-2 drops were added to the center circle of the ATR crystal using a dropper or syringe (for solid samples, an appropriate amount sufficed). The sample spectrum was scanned after confirming the sample completely covered the crystal. The <sup>1</sup>H-NMR was measured using DMSO- $d_6$  as a solvent (Bruker Avance 400 MHz spectrometer).

**Table S1** Densities (g cm<sup>-3</sup>) of C<sub>2</sub>mimCl-*n* + AmPyr (*n* = 2, 3, 4, 5, 6, 7).

| Entry | 293.15 K | 298.15 K | 303.15 K | 308.15 K | 313.15 K | 323.15 K | 333.15 K | 343.15 K | 353.15 K |
|-------|----------|----------|----------|----------|----------|----------|----------|----------|----------|
| 2     | 1.1675   | 1.1644   | 1.1614   | 1.1584   | 1.1554   | 1.1493   | 1.1433   | 1.1372   | 1.1312   |
| 3     | 1.1619   | 1.1589   | 1.1559   | 1.1530   | 1.1500   | 1.1441   | 1.1382   | 1.1323   | 1.1264   |
| 4     | 1.1585   | 1.1556   | 1.1526   | 1.1497   | 1.1468   | 1.1409   | 1.1351   | 1.1292   | 1.1235   |
| 5     | 1.1562   | 1.1532   | 1.1503   | 1.1474   | 1.1445   | 1.1386   | 1.1328   | 1.1270   | 1.1214   |
| 6     | 1.1547   | 1.1518   | 1.1489   | 1.1460   | 1.1431   | 1.1373   | 1.1316   | 1.1258   | 1.1202   |
| 7     | 1.1537   | 1.1507   | 1.1478   | 1.1450   | 1.1421   | 1.1363   | 1.1306   | 1.1249   | 1.1192   |

**Table S2** Density (g cm<sup>-3</sup>) of C<sub>2</sub>mimCl-7 + HBDs.

| Entry  | 293.15 K | 298.15 K | 303.15 K | 308.15 K | 313.15 K | 323.15 K | 333.15 K | 343.15 K | 353.15 K |
|--------|----------|----------|----------|----------|----------|----------|----------|----------|----------|
| BrPyr  | 1.1988   | 1.1956   | 1.1925   | 1.1894   | 1.1863   | 1.1801   | 1.1740   | 1.1681   | 1.1622   |
| Ura    | 1.1690   | 1.1661   | 1.1632   | 1.1603   | 1.1574   | 1.1516   | 1.1460   | 1.1403   | 1.1347   |
| Cyt    | 1.1676   | 1.1647   | 1.1619   | 1.1591   | 1.1562   | 1.1506   | 1.1451   | 1.1395   | 1.1340   |
| DAmPyr | 1.1650   | 1.1621   | 1.1593   | 1.1564   | 1.1536   | 1.1479   | 1.1423   | 1.1367   | 1.1311   |
| ChPyr  | 1.1635   | 1.1605   | 1.1575   | 1.1545   | 1.1516   | 1.1457   | 1.1399   | 1.1341   | 1.1284   |
| AmPyr  | 1.1537   | 1.1507   | 1.1478   | 1.1450   | 1.1421   | 1.1363   | 1.1306   | 1.1249   | 1.1192   |
| AmPd   | 1.1534   | 1.1505   | 1.1476   | 1.1448   | 1.1419   | 1.1362   | 1.1305   | 1.1249   | 1.1195   |
| AmPz   | 1.1513   | 1.1484   | 1.1456   | 1.1427   | 1.1398   | 1.1342   | 1.1286   | 1.1230   | 1.1175   |

**Table S3** Density fitting parameters of C<sub>2</sub>mimCl-*n* + AmPyr (*n* = 2, 3, 4, 5, 6, 7).

| Parameters                                      | 2       | 3       | 4       | 5       | 6       | 7       |
|-------------------------------------------------|---------|---------|---------|---------|---------|---------|
| $\alpha_l$ (g cm <sup>-3</sup> )                | 1.3447  | 1.3352  | 1.3298  | 1.3264  | 1.3235  | 1.3219  |
| $\beta_l \times 10^{-4}$ (g cm <sup>-3</sup> K) | -6.0467 | -5.9118 | -5.8427 | -5.8099 | -5.7590 | -5.7416 |
| <i>R2 l</i>                                     | 0.9999  | 0.9999  | 0.9998  | 0.9996  | 0.9998  | 0.9998  |

[illegible]



**Table S5** Viscosity (Pa s) of C<sub>2</sub>mimCl-*n* + AmPyr (*n* = 2, 3, 4, 5, 6, 7).

| Entr<br>y | 293.15<br>K | 298.15<br>K | 303.15<br>K | 313.15<br>K | 323.15<br>K | 333.15<br>K | 343.15<br>K | 353.15<br>K |
|-----------|-------------|-------------|-------------|-------------|-------------|-------------|-------------|-------------|
| 2         | 4.0670      | 2.2807      | 1.3169      | 0.5433      | 0.2689      | 0.1513      | 0.1007      | 0.0794      |
| 3         | 3.3194      | 1.8788      | 1.0973      | 0.4665      | 0.2367      | 0.1455      | 0.1035      | 0.0812      |
| 4         | 3.1815      | 1.8450      | 1.0962      | 0.4795      | 0.2487      | 0.1437      | 0.0925      | 0.0675      |
| 5         | 2.9871      | 1.7520      | 1.0531      | 0.4623      | 0.2412      | 0.1432      | 0.0976      | 0.0849      |
| 6         | 2.5186      | 1.5188      | 0.9298      | 0.3996      | 0.2171      | 0.1339      | 0.0920      | 0.0798      |
| 7         | 2.3447      | 1.3884      | 0.8467      | 0.3855      | 0.2066      | 0.1224      | 0.0829      | 0.0653      |

**Table S6** Viscosity (Pa s) of HBAs-7 + HBDs.

| Entry    | 293.15 K | 298.15 K | 303.15 K | 313.15 K | 323.15 K | 333.15 K | 343.15 K | 353.15 K |
|----------|----------|----------|----------|----------|----------|----------|----------|----------|
| <i>a</i> | 2.5680   | 1.6355   | 1.0510   | 0.5331   | 0.2901   | 0.1768   | 0.1180   | 0.0918   |
| <i>b</i> | 2.3447   | 1.3884   | 0.8467   | 0.3855   | 0.2066   | 0.1224   | 0.0829   | 0.0653   |
| <i>c</i> | 2.2717   | 1.4804   | 0.9785   | 0.5014   | 0.2758   | 0.1701   | 0.1117   | 0.0906   |
| <i>d</i> | 1.9499   | 1.2093   | 0.7729   | 0.3755   | 0.2096   | 0.1239   | 0.0891   | 0.0799   |
| <i>e</i> | 1.2998   | 0.8594   | 0.5805   | 0.3116   | 0.1803   | 0.1182   | 0.0857   | 0.0736   |
| <i>f</i> | 0.8651   | 0.5771   | 0.3969   | 0.2156   | 0.1324   | 0.0885   | 0.0636   | 0.0544   |
| <i>g</i> | 0.6081   | 0.4247   | 0.3013   | 0.1739   | 0.1085   | 0.0754   | 0.0545   | 0.0450   |
| <i>h</i> | 0.5059   | 0.3688   | 0.2742   | 0.1613   | 0.1001   | 0.0725   | 0.0607   | 0.0505   |
| <i>i</i> | 0.3018   | 0.2256   | 0.1686   | 0.1063   | 0.0719   | 0.0531   | 0.0418   | 0.0349   |

*a*: C<sub>2</sub>mimCl-7 + Cyt; *b*: C<sub>2</sub>mimCl-7 + AmPyr; *c*: C<sub>2</sub>mimCl-7 + DAmPyr; *d*: C<sub>2</sub>mimCl-7 + AmPd;  
*e*: C<sub>2</sub>mimCl-7 + Ura; *f*: C<sub>2</sub>mimCl-7 + AmPz; *g*: C<sub>2</sub>mimCl-7 + ChPyr; *h*: C<sub>2</sub>mimBr-7 + AmPyr; *i*:  
C<sub>2</sub>mimCl-7 + BrPyr.

**Table S7** Viscosity fitting parameters of C<sub>2</sub>mimCl-*n* + AmPyr (*n* = 2, 3, 4, 5, 6, 7).

| Parameters               | 2           | 3           | 4            | 5           | 6           | 7           |
|--------------------------|-------------|-------------|--------------|-------------|-------------|-------------|
| $\eta_0 \times 10^4$ (Pa | 2.546 $\pm$ | 6.194 $\pm$ | 3.625 $\pm$  | 4.804 $\pm$ | 3.109 $\pm$ | 5.847 $\pm$ |
| s)                       | 1.550       | 3.545       | 1.770        | 2.894       | 2.828       | 2.319       |
| $t_l$ (K)                | 744.9 $\pm$ | 589.1 $\pm$ | 694.45 $\pm$ | 653.3 $\pm$ | 728.3 $\pm$ | 601.2 $\pm$ |
|                          | 95.64       | 81.05       | 77.03        | 93.383      | 152.8       | 59.98       |
| $T_0$ (K)                | 216.2 $\pm$ | 224.6 $\pm$ | 216.7 $\pm$  | 218.4 $\pm$ | 212.3 $\pm$ | 220.7 $\pm$ |
|                          | 4.886       | 4.675       | 4.241        | 5.363       | 8.588       | 3.644       |
| $R^2$                    | 0.999       | 0.999       | 0.999        | 0.999       | 0.999       | 0.999       |

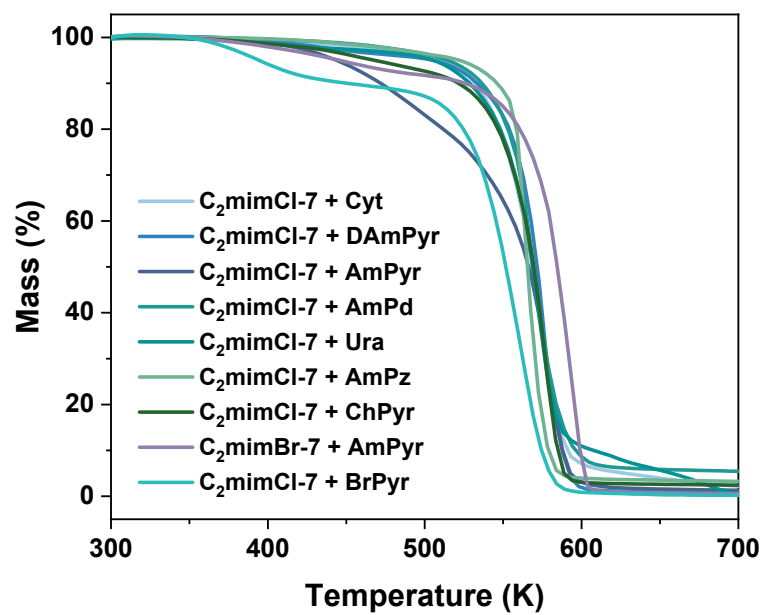

Fig. S1 TG analysis diagrams of pyrimidine-based DESs.

**Table S8** the comparison of SO<sub>2</sub> absorption with other materials.

| Absorbents                      | Temperature (K) | Pressure (bar) | $m_{\text{SO}_2}$ (mol kg <sup>-1</sup> ) <sup>a</sup> | Reference |
|---------------------------------|-----------------|----------------|--------------------------------------------------------|-----------|
| NiBDP                           | 298             | 1.0            | 8.48                                                   | S1        |
| Mg <sub>2</sub> (dobpdc)        | 298             | 1.0            | 19.5                                                   | S2        |
| HIAM-330                        | 298             | 1.0            | 12.1                                                   | S3        |
| SIFSIX-7-Cu                     | 298             | 1.0            | 14.7                                                   | S4        |
| Zr-bptc                         | 298             | 1.0            | 7.8                                                    | S5        |
| MFM-133                         | 298             | 1.0            | 8.9                                                    | S5        |
| MFM-422                         | 298             | 1.0            | 13.6                                                   | S5        |
| DUT-8                           | 293             | 0.97           | 13.99                                                  | S6        |
| DMOF                            | 293             | 0.97           | 13.09                                                  | S6        |
| DMOF-NDC                        | 293             | 0.97           | 10.09                                                  | S6        |
| DMOF-ADC                        | 293             | 0.97           | 6.51                                                   | S6        |
| NU-1801(Y)                      | 298             | 1.0            | 8.78                                                   | S7        |
| NU-1801(Zr)                     | 298             | 1.0            | 10.98                                                  | S7        |
| NU-1801(Hf)                     | 298             | 1.0            | 8.45                                                   | S7        |
| NU-1801(Ce)                     | 298             | 1.0            | 8.59                                                   | S7        |
| NU-1801(Th)                     | 298             | 1.0            | 5.31                                                   | S7        |
| 6FT-RCC3                        | 298             | 1.0            | 13.78                                                  | S8        |
| MOC-Pd-BF <sub>4</sub>          | 298             | 1.0            | 3.63                                                   | S9        |
| MOC-Pd-NO <sub>3</sub>          | 298             | 1.0            | 5.98                                                   | S9        |
| C <sub>2</sub> mimBr-7 + AmPyr  | 298             | 1.0            | 14.630                                                 | This work |
| C <sub>2</sub> mimCl-7 + BrPyr  | 298             | 1.0            | 17.704                                                 | This work |
| C <sub>2</sub> mimCl-7 + Ura    | 298             | 1.0            | 17.791                                                 | This work |
| C <sub>2</sub> mimCl-7 + AmPz   | 298             | 1.0            | 18.017                                                 | This work |
| C <sub>2</sub> mimCl-7 + ChPyr  | 298             | 1.0            | 18.062                                                 | This work |
| C <sub>2</sub> mimCl-7 + Cyt    | 298             | 1.0            | 18.243                                                 | This work |
| C <sub>2</sub> mimCl-7 + DAmPyr | 298             | 1.0            | 18.595                                                 | This work |
| C <sub>2</sub> mimCl-7 + AmPd   | 298             | 1.0            | 18.746                                                 | This work |
| C <sub>2</sub> mimCl-7 + AmPyr  | 298             | 1.0            | 19.032                                                 | This work |

<sup>a</sup> The units of mol kg<sup>-1</sup> and mmol g<sup>-1</sup> are the same.

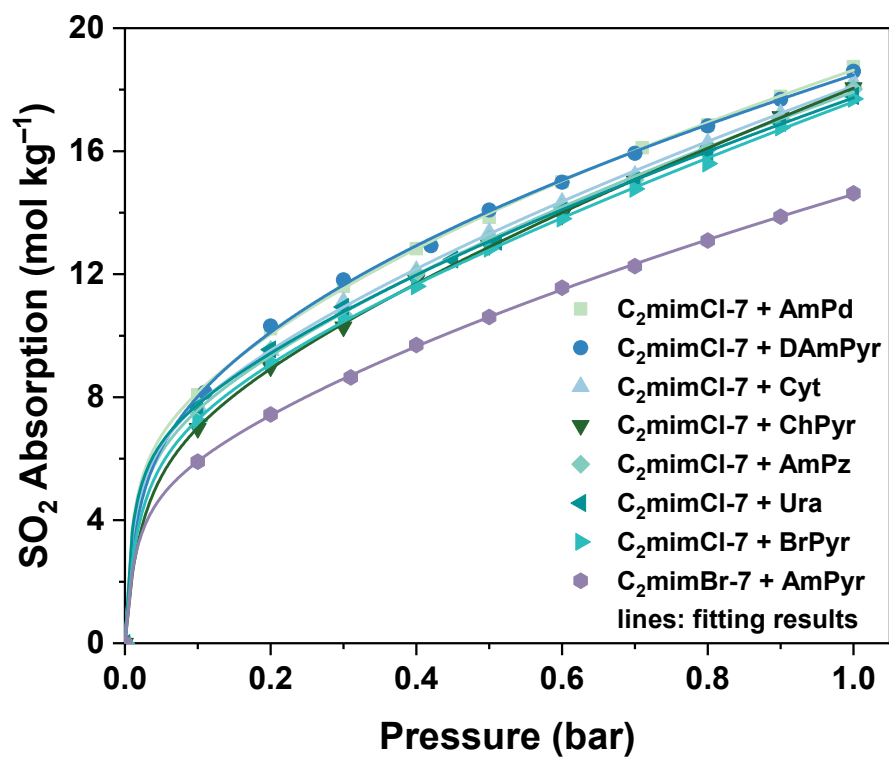

Fig. S2 DS-DETM equation fitting of pyrimidine-based DESs for SO<sub>2</sub> absorption at 298.15K.

**Table S9** Calculated Henry's constants, reaction equilibrium constants, and  $R^2$  of SO<sub>2</sub> absorption in pyrimidine-based DESs.

| Parameters                      | $H$ (bar) | $k_{HBAs}$ | $k_{HBDs}$ | $R^2$ |
|---------------------------------|-----------|------------|------------|-------|
| C <sub>2</sub> mimCl-7 + AmPd   | 0.17924   | 105.83109  | 1.49431    | 0.999 |
| C <sub>2</sub> mimCl-7 + DAmPyr | 0.17705   | 64.47111   | 2.06037    | 0.999 |
| C <sub>2</sub> mimCl-7 + Cyt    | 0.15649   | 89.83788   | 1.23746    | 0.999 |
| C <sub>2</sub> mimCl-7 + ChPyr  | 0.13961   | 43.40060   | 0.93549    | 0.999 |
| C <sub>2</sub> mimCl-7 + AmPz   | 0.1689    | 76.12600   | 1.00501    | 0.999 |
| C <sub>2</sub> mimCl-7 + Ura    | 0.16222   | 102.09880  | 1.17318    | 0.999 |
| C <sub>2</sub> mimCl-7 + BrPyr  | 0.13774   | 55.89346   | 1.37954    | 0.999 |
| C <sub>2</sub> mimBr-7 + AmPyr  | 0.22827   | 70.53194   | 0.92582    | 0.999 |

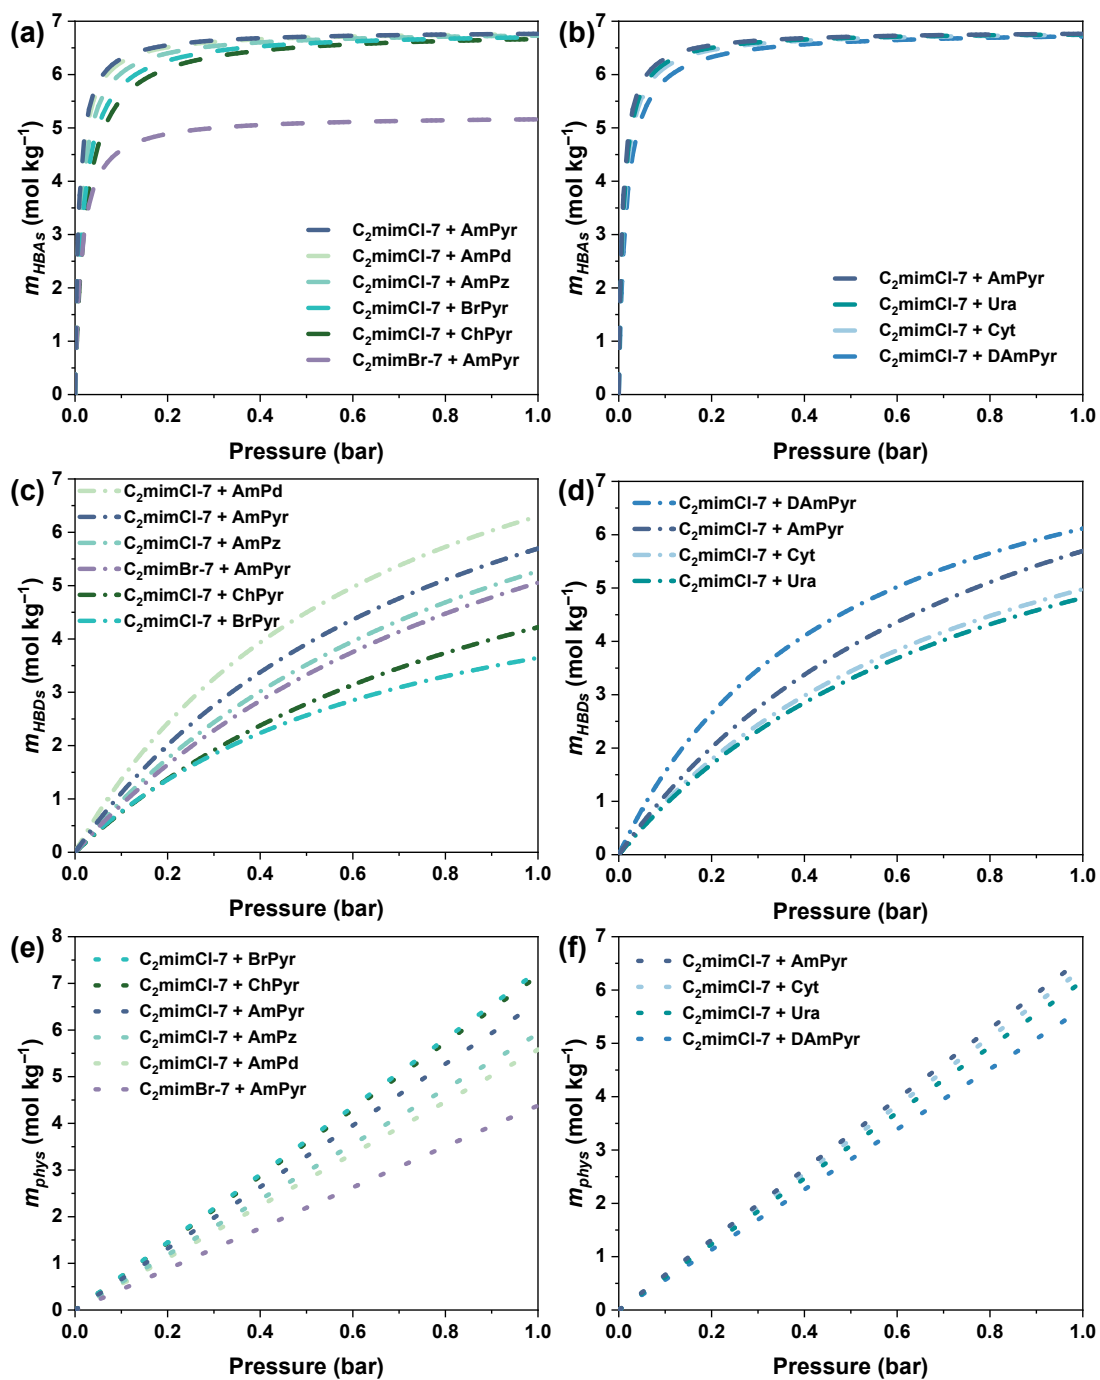

**Fig. S3** The calculated  $m_{phys}$ ,  $m_{HBAs}$ , and  $m_{HBDs}$  of corresponding HBAs-7 + HBDs DESs at 298.15 K; Comparison between C<sub>2</sub>mimCl-7 + AmPyr and (a, c, e) monofunctional or (b, d, f) multifunctional DESs.



**Table S10** The SO<sub>2</sub> absorption capacity and selectivity of the DESs compare with other absorbents.

| Absorbents                      | Temperature (K) | $m_{\text{SO}_2}$ (mol kg <sup>-1</sup> ) | Selectivity (SO <sub>2</sub> /CO <sub>2</sub> ) | Reference |
|---------------------------------|-----------------|-------------------------------------------|-------------------------------------------------|-----------|
| DMI                             | 293.15          | 14.332                                    | —                                               | S10       |
| DMPU                            | 293.15          | 13.620                                    | —                                               | S10       |
| TMU                             | 293.15          | 14.054                                    | —                                               | S10       |
| [emim]Cl+DCDA (3:1)             | 298.15          | 16.58                                     | —                                               | S11       |
| PEG 200-EmimCl (1:1)            | 298.2           | 10.95                                     | 12.8                                            | S12       |
| TeEG-EminCl (1:1)               | 298.2           | 12.48                                     | 14.2                                            | S12       |
| TeEG-EmimCl (1:2)               | 298.2           | 13.25                                     | 29.9                                            | S12       |
| [TMEA][MOAc]                    | 303.2           | 10.424                                    | 86.83                                           | S13       |
| [EimH]Cl/EG (1:2)               | 293.2           | 8.366                                     | —                                               | S14       |
| [EimH]Cl/EG (1:1)               | 293.2           | 9.814                                     | —                                               | S14       |
| [EimH]Cl/EG (2:1)               | 293.2           | 11.10                                     | —                                               | S14       |
| [EimH]Cl/EG (3:1)               | 293.2           | 11.60                                     | 655                                             | S14       |
| EmimCl + 6-HoP-7                | 298.15          | 17.213                                    | 491.8                                           | S15       |
| EmimCl + 6-AmP-7                | 298.15          | 18.118                                    | 517.7                                           | S15       |
| EmimCl + 6-ChP-7                | 298.15          | 17.399                                    | 527.2                                           | S15       |
| C <sub>2</sub> mimCl-7 + ChPyr  | 298.15          | 18.062                                    | 451.6                                           | This work |
| C <sub>2</sub> mimCl-7 + Ura    | 298.15          | 17.791                                    | 494.2                                           | This work |
| C <sub>2</sub> mimCl-7 + AmPyr  | 298.15          | 19.032                                    | 528.7                                           | This work |
| C <sub>2</sub> mimCl-7 + BrPyr  | 298.15          | 17.704                                    | 536.5                                           | This work |
| C <sub>2</sub> mimCl-7 + DAmPyr | 298.15          | 18.595                                    | 808.5                                           | This work |
| C <sub>2</sub> mimCl-7 + Cyt    | 298.15          | 18.243                                    | 1073.1                                          | This work |

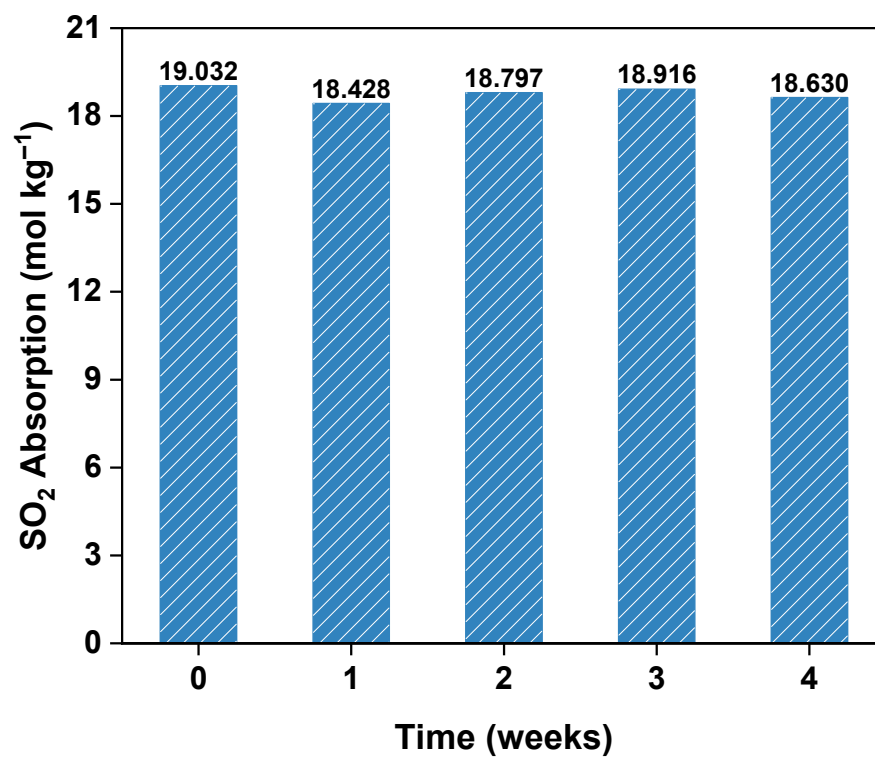

Fig. S4 The stability of  $\text{C}_2\text{mimCl-7} + \text{AmPyr}$ ;  $T = 298.15 \text{ K}$ ,  $P = 1.0 \text{ bar}$ .

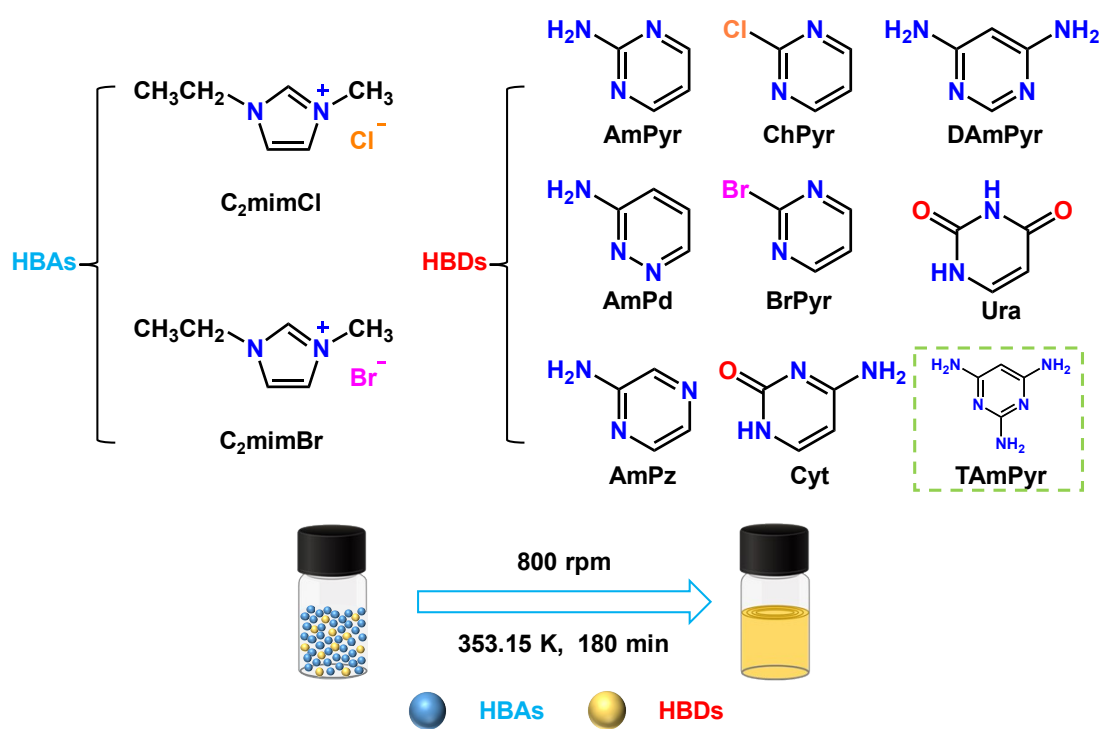

**Scheme S2** The structural formulas of HBAs and HBDs, as well as the preparation process of DESs.

## References

- S1 J.L. Obeso, K. Gopalsamy, M. Wahiduzzaman, E. Martínez-Ahumada, D. Fan, H.A. Lara-García, F.J. Carmona, G. Maurin, I.A. Ibarra and J.A.R. Navarro, Impact of Ni(ii) coordinatively unsaturated sites and coordinated water molecules on SO<sub>2</sub> adsorption by a MOF with octanuclear metal clusters, *J. Mater. Chem. A*, 2024, **12**, 10157-10165.
- S2 E. Martínez-Ahumada, D.w. Kim, M. Wahiduzzaman, P. Carmona-Monroy, A. López-Olvera, D.R. Williams, V. Martis, H.A. Lara-García, S. López-Morales, D. Solis-Ibarra, G. Maurin, I.A. Ibarra and C.S. Hong, Capture and detection of SO<sub>2</sub> using a chemically stable Mg(ii)-MOF, *J. Mater. Chem. A*, 2022, **10**, 18636-18643.
- S3 L. Yu, M. He, J. Yao, Q. Xia, S. Yang, J. Li and H. Wang, A robust aluminum-octacarboxylate framework with scu topology for selective capture of sulfur dioxide, *Chem. Sci.*, 2024, **15**, 8530-8535.
- S4 J. Ren, W. Zeng, Y. Ying, D. Liu and Q. Yang, Discovery of anion-pillared metal-organic frameworks for efficient SO<sub>2</sub>/CO<sub>2</sub> separation via computational screening, *AIChE J.*, 2024, **70**, e18351.
- S5 J. Li, G.L. Smith, Y. Chen, Y. Ma, M. Kippax-Jones, M. Fan, W. Lu, M.D. Frogley, G. Cinque, S.J. Day, S.P. Thompson, Y. Cheng, L.L. Daemen, A.J. Ramirez-Cuesta, M. Schröder and S. Yang, Structural and dynamic analysis of sulphur dioxide adsorption in a series of zirconium-based metal-organic frameworks, *Angew. Chem. Int. Edit.*, 2022, **61**, e202207259.
- S6 S. Xing, A. Mohabbat, I. Boldog, J. Möllmer, M. Lange, Y. Haiduk, T. Heinen, V. Pankov, O. Weingart and C. Janiak, Rational fine-tuning of mof pore metrics: Enhanced SO<sub>2</sub> capture and sensing with optimal multi-site interactions, *Adv. Funct. Mater.*, 2025, 2503013.
- S7 C. Zhang, Y. Xie, H. Xie, X. Wang, F. Sha, K.O. Kirlikovali, X. Wang, Y. Chen, G.W. Peterson and O.K. Farha, Interrogating the metal identity effect of isostructural NU-1801 frameworks on toxic gas capture with moisture-enhanced feature, *ACS Appl. Mater. Interfaces*, 2025, **17**, 64910-64920.

- S8 E. Martínez-Ahumada, D. He, V. Berryman, A. López-Olvera, M. Hernandez, V. Jancik, V. Martis, M.A. Vera, E. Lima, D.J. Parker, A.I. Cooper, I.A. Ibarra and M. Liu, SO<sub>2</sub> capture using porous organic cages, *Angew. Chem. Int. Edit.*, 2021, **60**, 17556-17563.
- S9 E.G. Percástegui, E. Sánchez-González, S. de Jesús Valencia-Loza, S. Cruz-Nava, V. Jancik and D. Martínez-Otero, Counterions determine if metal-organic cages convert SO<sub>2</sub> to sulfate or reversibly adsorb it, *Angew. Chem. Int. Edit.*, 2024, e202421169
- S10 Y. Jiang, X. Liu and D. Deng, Solubility and thermodynamic properties of SO<sub>2</sub> in three low volatile urea derivatives, *J. Chem. Thermodyn.*, 2016, **101**, 12-18.
- S11 X. Wu, R. Guan, W. Zheng and K. Huang, New deep eutectic solvents formed by 1-ethyl-3-methylimidazolium chloride and dicyandiamide: Physiochemical properties and SO<sub>2</sub> absorption performance, *J. Taiwan Inst. Chem. E.*, 2021, **119**, 45-51.
- S12 M. Liu, T. Zhao, H. Dong, Y. Xu and C. Zhu, Absorption of SO<sub>2</sub> by deep eutectic solvents composed of EmimCl and dihydric alcohols: Thermodynamic and absorption mechanism studies, *J. Mol. Liq.*, 2023, **369**, 120878.
- S13 P. Liu, K. Cai, X. Zhang, X. Wang, M. Xu, F. Liu and T. Zhao, Rich ether-based protic ionic liquids with low viscosity for selective absorption of SO<sub>2</sub> through multisite interaction, *Ind. Eng. Chem. Res.*, 2022, **61**, 5971-5983.
- S14 P. Zhang, Z. Tu, X. Zhang, X. Hu and Y. Wu, Acidic protic ionic liquid-based deep eutectic solvents capturing SO<sub>2</sub> with low enthalpy changes, *AIChE J.*, 2023, **69**, e18145.
- S15 Y. Zou, C. Wang, H. Ji, P. Wu, Y. Chao, X. Yu, Z. Yu, H. Liu, Z. Liu and W. Zhu, Rapid, selectivity, and reversibility absorption of SO<sub>2</sub> via purine-based deep eutectic solvents and thermodynamic analysis, *Green Chem. Eng.*, 2024, DOI: 10.1016/j.gce.2024.1010.1005.
